# Supplementary material
Source: PubMed Central journal article supplement (PMC9550909)
Supplement: 11606_2022_7574_MOESM1_ESM.pdf [file 11606_2022_7574_MOESM1_ESM.pdf]

Supplemental Table 1: Risk of Bias Assessment

| Reference            | 1. Was there a clear statement of the aims of the research? | 2. Is a qualitative methodology appropriate? | 3. Was the research design appropriate to address the aims of the research? | 4. Was the recruitment strategy appropriate to the aims of the research? | 5. Was the data collected in a way that addressed the research issue? | 6. Has the relationship between researcher and participants been adequately considered? | 7. Have ethical issues been taken into consideration? | 8. Was the data analysis sufficiently rigorous? | 9. Is there a clear statement of findings? |
|----------------------|-------------------------------------------------------------|----------------------------------------------|-----------------------------------------------------------------------------|--------------------------------------------------------------------------|-----------------------------------------------------------------------|-----------------------------------------------------------------------------------------|-------------------------------------------------------|-------------------------------------------------|--------------------------------------------|
| Forrest et al 2002   | Yes                                                         | Yes                                          | Yes                                                                         | Yes                                                                      | Yes                                                                   | No                                                                                      | Yes                                                   | Yes                                             | Yes                                        |
| Kinchen et al 2004   | Yes                                                         | Yes                                          | Yes                                                                         | Yes                                                                      | Yes                                                                   | No                                                                                      | Yes                                                   | Yes                                             | Yes                                        |
| Abel et al 2012      | Yes                                                         | Yes                                          | Yes                                                                         | Yes                                                                      | Yes                                                                   | Yes                                                                                     | Yes                                                   | Yes                                             | Yes                                        |
| Barnett et al 2012   | Yes                                                         | Yes                                          | Yes                                                                         | Yes                                                                      | Yes                                                                   | No                                                                                      | Yes                                                   | Yes                                             | Yes                                        |
| Brown et al 2013     | Yes                                                         | Yes                                          | Yes                                                                         | Yes                                                                      | Yes                                                                   | No                                                                                      | Yes                                                   | Yes                                             | Yes                                        |
| Gao et al 2021       | Yes                                                         | Yes                                          | Yes                                                                         | No                                                                       | Yes                                                                   | Yes                                                                                     | Yes                                                   | Yes                                             | Yes                                        |
| Makovkina et al 2021 | Yes                                                         | Yes                                          | Yes                                                                         | Moderate                                                                 | Yes                                                                   | No                                                                                      | Yes                                                   | Yes                                             | Yes                                        |

Supplemental Table 2: Factors considered when making referrals and resultant codes abstracted from full text review

|                                              | Consultant's clinical expertise                   |                               | Interactions between patient and consultant           |                           | Interactions between referring physician and consultant             |                                  |
|----------------------------------------------|---------------------------------------------------|-------------------------------|-------------------------------------------------------|---------------------------|---------------------------------------------------------------------|----------------------------------|
|                                              | Factor                                            | Code                          | Factor                                                | Code                      | Factor                                                              | Code                             |
| Forrest et al. 2002                          | Technical capacity                                | Clinical Skill                | Quality of prior feedback                             | Prior Patient Experience  | Personal knowledge of the specialist                                | Personal knowledge/relationships |
|                                              |                                                   |                               | Appointment availability                              | Convenience of Scheduling |                                                                     |                                  |
|                                              |                                                   |                               | Patient request                                       | Patient Preference        |                                                                     |                                  |
|                                              |                                                   |                               | Requirement of patient's health plan                  | Insurance                 |                                                                     |                                  |
|                                              |                                                   |                               | Proximity of specialist to patient's home             | Location                  |                                                                     |                                  |
| Kinchen et al. 2004                          | Medical skill<br>Board certification              | Clinical Skill                | Previous experience with specialist                   | Prior Patient Experience  | Specialist returns to primary physician                             | Patient returns                  |
|                                              |                                                   |                               | Patient convenience<br>Office location                | Location                  | PCP relationship with specialist                                    | Personal knowledge/relationships |
|                                              | Quality of communication                          | Communication                 | Appointment timeliness                                | Convenience of Scheduling | Hospital affiliation                                                | Hospital/Practice Affiliation    |
|                                              |                                                   |                               | Likelihood of good patient-physician rapport          | Rapport                   | Attitudes of colleagues towards specialist                          | Reputation                       |
|                                              | Medical school<br>Fellowship training institution | Training                      | Insurance coverage                                    | Insurance                 | Specialist refers patients to primary physician                     | Reciprocity                      |
| Patient preference for particular specialist |                                                   |                               | Patient Preference                                    |                           |                                                                     |                                  |
| Abel et al. 2012                             | Reputation of specialist/facility                 | Reputation                    | Patient's preference for site of care                 | Patient Preference        | Practice's affiliation with specialist                              | Hospital/Practice Affiliation    |
|                                              | Specialist's affiliation with cancer center       | Hospital/Practice Affiliation | Distance of site from patient's home                  | Location                  | Personal relationship with specialist                               | Personal knowledge/relationships |
|                                              | Availability of clinical trials at referral site  | Other                         | Patient's ability to pay                              | Insurance                 | Possibility of losing patient to specialist                         | Patient returns                  |
| Barnett et al. 2012                          |                                                   |                               | My patients have good experiences with this physician | Prior patient experience  | Quality of communication with me<br>Shares my medical record system | Communication                    |
|                                              |                                                   |                               | Physician has good patient rapport                    | Rapport                   |                                                                     |                                  |
|                                              |                                                   |                               | Timely availability of appointments                   | Convenience of Scheduling | Physician refers to me                                              | Reciprocity                      |
|                                              |                                                   |                               | Location convenient for patient                       | Location                  |                                                                     |                                  |
|                                              |                                                   |                               | Patient request                                       | Patient Preference        | Works in my hospital or practice                                    | Hospital/Practice Affiliation    |
| Speaks patient's language                    | Communication                                     |                               |                                                       |                           |                                                                     |                                  |
| Brown et al. 2013                            | Report cards                                      | Summative assessment          | Patient satisfaction                                  | Prior patient experience  | Hospital affiliation                                                | Hospital/Practice Affiliation    |

|                                |                                                                                                                                      |                  |                                                                     |                                                              |                                                                                                                     |                                  |
|--------------------------------|--------------------------------------------------------------------------------------------------------------------------------------|------------------|---------------------------------------------------------------------|--------------------------------------------------------------|---------------------------------------------------------------------------------------------------------------------|----------------------------------|
|                                | Technical skill<br>Clinical judgement<br>Post-operative care                                                                         | Clinical Skill   |                                                                     |                                                              |                                                                                                                     |                                  |
|                                | Outcomes other than mortality<br>Risk-adjusted mortality                                                                             | Clinical Outcome |                                                                     |                                                              |                                                                                                                     |                                  |
|                                | Effective communication                                                                                                              | Communication    |                                                                     |                                                              |                                                                                                                     |                                  |
| <b>Gao et al. 2021</b>         | Patient complexity<br>Surgeon experience and volume                                                                                  | Clinical Skill   | Preference for care to be received locally                          | Location                                                     | GIs preferred to refer to colorectal surgeons while most general surgeons perform surgery on patients they diagnose | Other                            |
|                                |                                                                                                                                      |                  | Specialist availability                                             | Convenience of Scheduling                                    |                                                                                                                     |                                  |
|                                | GIs would refer a family member to a trusted colorectal surgeon. Surgeons would refer a family member to a large or academic center. | Other            | Patient Preference                                                  | Patient Preference                                           | Preference to remain in health system                                                                               | Hospital/Practice Affiliation    |
| <b>Makovkina and Kern 2021</b> | Clinical judgement                                                                                                                   | Clinical Skill   | Geographic preference                                               | Location                                                     | Preference or Institutional pressure to refer within organization<br>Cost containment                               | Hospital/Practice Affiliation    |
|                                |                                                                                                                                      |                  | Ease of scheduling<br>Flexibility in accommodating urgent referrals | Convenience of Scheduling                                    |                                                                                                                     |                                  |
|                                |                                                                                                                                      |                  | Patient feedback                                                    | Prior patient experience                                     |                                                                                                                     |                                  |
|                                | Clinical reputation of physicians organization                                                                                       | Reputation       | Insurance coverage                                                  | Insurance                                                    | Personal knowledge and trust of specialist                                                                          | Personal knowledge/Relationships |
| Patient preference             |                                                                                                                                      |                  | Patient Preference                                                  | Ease of communication and coordination of care<br>Shared EMR | Communication                                                                                                       |                                  |

Supplemental Table 3: Methods for weighing factor importance and importance weight of included survey studies

| Included Study      | Method for weighting factor                                                      | Reported Weight                                                                              | Weight given to factor | Factors Cited in Selecting Specialist               |
|---------------------|----------------------------------------------------------------------------------|----------------------------------------------------------------------------------------------|------------------------|-----------------------------------------------------|
| Forrest et al. 2002 | Importance rating of factor in each referral examined (scale 1-3)                | Mean importance rating                                                                       | 2.6                    | Personal knowledge of the specialist                |
|                     |                                                                                  |                                                                                              | 2.5                    | Quality of prior feedback                           |
|                     |                                                                                  |                                                                                              | 2.3                    | Technical capacity                                  |
|                     |                                                                                  |                                                                                              | 2                      | Appointment availability                            |
|                     |                                                                                  |                                                                                              | 1.6                    | Patient request                                     |
|                     |                                                                                  |                                                                                              | 1.6                    | Requirement of patient's health plan                |
|                     |                                                                                  |                                                                                              | 1.6                    | Proximity of specialist to patient's home           |
| Kinchen et al. 2004 | 4 point Likert scale (no, mild, moderate, and major importance)                  | Percent of providers who rated factor as having major importance                             | 87.5                   | Medical skill                                       |
|                     |                                                                                  |                                                                                              | 59.2                   | Previous experience with specialist                 |
|                     |                                                                                  |                                                                                              | 55.4                   | Appointment timeliness                              |
|                     |                                                                                  |                                                                                              | 52.5                   | Quality of communication                            |
|                     |                                                                                  |                                                                                              | 51.4                   | Likelihood of good patient-physician rapport        |
|                     |                                                                                  |                                                                                              | 51.1                   | Specialist returns [patient] to primary physician   |
|                     |                                                                                  |                                                                                              | 49.6                   | Insurance coverage                                  |
|                     |                                                                                  |                                                                                              | 40.9                   | Patient preference for particular specialist        |
|                     |                                                                                  |                                                                                              | 35.9                   | Primary care physician relationship with specialist |
|                     |                                                                                  |                                                                                              | 33.9                   | Board certification                                 |
|                     |                                                                                  |                                                                                              | 23.8                   | Patient convenience                                 |
|                     |                                                                                  |                                                                                              | 14.5                   | Attitudes of colleagues towards specialist          |
|                     |                                                                                  |                                                                                              | 13.6                   | Hospital affiliation                                |
|                     |                                                                                  |                                                                                              | 9.4                    | Office location                                     |
|                     |                                                                                  |                                                                                              | 4.2                    | Specialist refers patients to primary physician     |
|                     |                                                                                  |                                                                                              | 0.4                    | Medical school                                      |
| 0.2                 | Fellowship training institution                                                  |                                                                                              |                        |                                                     |
| Abel et al 2012     | 5 point Likert scale (ranging from 1="not important" to 5="extremely important") | Percent of providers who rated factor as $\geq 3$ (moderately, very, or extremely important) | 96.2                   | Reputation of specialist/facility                   |
|                     |                                                                                  |                                                                                              | 94                     | Patient's preference for site of care               |
|                     |                                                                                  |                                                                                              | 91.7                   | Distance of site from patient's home                |
|                     |                                                                                  |                                                                                              | 88.7                   | Specialist's affiliation with cancer center         |
|                     |                                                                                  |                                                                                              | 81.2                   | Practice's affiliation with specialist              |
| 79                  | Personal relationship with specialist                                            |                                                                                              |                        |                                                     |

|                        |                                                                                                         |                                                                   |                     |                                                                               |
|------------------------|---------------------------------------------------------------------------------------------------------|-------------------------------------------------------------------|---------------------|-------------------------------------------------------------------------------|
|                        |                                                                                                         |                                                                   | 68.4                | Patient's ability to pay                                                      |
|                        |                                                                                                         |                                                                   | 66.9                | Availability of clinical trials at referral site                              |
|                        |                                                                                                         |                                                                   | 15.8                | Possibility of losing patient to specialist                                   |
| Barnett et al.<br>2012 | Respondents provided up to two factors <i>besides clinical expertise</i> for each referral relationship | Percent of relationships in which factor was considered important | 53.1                | My patients have good experiences with this physician                         |
|                        |                                                                                                         |                                                                   | 30.5                | Works in my hospital or practice                                              |
|                        |                                                                                                         |                                                                   | 25.1                | Physician has good patient rapport                                            |
|                        |                                                                                                         |                                                                   | 19.5                | Quality of communication with me                                              |
|                        |                                                                                                         |                                                                   | 13                  | Location convenient for patient                                               |
|                        |                                                                                                         |                                                                   | 12.5                | Shares my medical record system                                               |
|                        |                                                                                                         |                                                                   | 12.2                | Timely availability of appointments                                           |
|                        |                                                                                                         |                                                                   | 3.5                 | Patient request                                                               |
|                        |                                                                                                         |                                                                   | 2.5                 | Physician refers to me                                                        |
|                        |                                                                                                         |                                                                   | 0.5                 | Speaks patient's language                                                     |
|                        |                                                                                                         |                                                                   | Brown et al<br>2013 | 5 point Likert scale (not, minimally, somewhat, very, or extremely important) |
| 94.8                   | Post-operative care                                                                                     |                                                                   |                     |                                                                               |
| 92                     | Outcomes other than mortality                                                                           |                                                                   |                     |                                                                               |
| 84.5                   | Clinical judgement                                                                                      |                                                                   |                     |                                                                               |
| 83.1                   | Risk-adjusted mortality                                                                                 |                                                                   |                     |                                                                               |
| 81.8                   | Patient satisfaction                                                                                    |                                                                   |                     |                                                                               |
| 73.7                   | Effective communication                                                                                 |                                                                   |                     |                                                                               |
| 58                     | Hospital affiliation                                                                                    |                                                                   |                     |                                                                               |
| 18                     | Report cards                                                                                            |                                                                   |                     |                                                                               |

Author

## PRISMA 2020 Checklist

| Section and Topic             | Item # | Checklist item                                                                                                                                                                                                                                                                                       | Reported on Page # |
|-------------------------------|--------|------------------------------------------------------------------------------------------------------------------------------------------------------------------------------------------------------------------------------------------------------------------------------------------------------|--------------------|
| <b>TITLE</b>                  |        |                                                                                                                                                                                                                                                                                                      |                    |
| Title                         | 1      | Identify the report as a systematic review.                                                                                                                                                                                                                                                          | 1                  |
| <b>ABSTRACT</b>               |        |                                                                                                                                                                                                                                                                                                      |                    |
| Abstract                      | 2      | See the PRISMA 2020 for Abstracts checklist.                                                                                                                                                                                                                                                         | -                  |
| <b>INTRODUCTION</b>           |        |                                                                                                                                                                                                                                                                                                      |                    |
| Rationale                     | 3      | Describe the rationale for the review in the context of existing knowledge.                                                                                                                                                                                                                          | 4-5                |
| Objectives                    | 4      | Provide an explicit statement of the objective(s) or question(s) the review addresses.                                                                                                                                                                                                               | 5                  |
| <b>METHODS</b>                |        |                                                                                                                                                                                                                                                                                                      |                    |
| Eligibility criteria          | 5      | Specify the inclusion and exclusion criteria for the review and how studies were grouped for the syntheses.                                                                                                                                                                                          | 6                  |
| Information sources           | 6      | Specify all databases, registers, websites, organisations, reference lists and other sources searched or consulted to identify studies. Specify the date when each source was last searched or consulted.                                                                                            | 5                  |
| Search strategy               | 7      | Present the full search strategies for all databases, registers and websites, including any filters and limits used.                                                                                                                                                                                 | 5                  |
| Selection process             | 8      | Specify the methods used to decide whether a study met the inclusion criteria of the review, including how many reviewers screened each record and each report retrieved, whether they worked independently, and if applicable, details of automation tools used in the process.                     | 5                  |
| Data collection process       | 9      | Specify the methods used to collect data from reports, including how many reviewers collected data from each report, whether they worked independently, any processes for obtaining or confirming data from study investigators, and if applicable, details of automation tools used in the process. | 6-7                |
| Data items                    | 10a    | List and define all outcomes for which data were sought. Specify whether all results that were compatible with each outcome domain in each study were sought (e.g. for all measures, time points, analyses), and if not, the methods used to decide which results to collect.                        | 6                  |
|                               | 10b    | List and define all other variables for which data were sought (e.g. participant and intervention characteristics, funding sources). Describe any assumptions made about any missing or unclear information.                                                                                         | 6-7                |
| Study risk of bias assessment | 11     | Specify the methods used to assess risk of bias in the included studies, including details of the tool(s) used, how many reviewers assessed each study and whether they worked independently, and if applicable, details of automation tools used in the process.                                    | 7                  |
| Effect measures               | 12     | Specify for each outcome the effect measure(s) (e.g. risk ratio, mean difference) used in the synthesis or presentation of results.                                                                                                                                                                  | 7                  |
| Synthesis methods             | 13a    | Describe the processes used to decide which studies were eligible for each synthesis (e.g. tabulating the study intervention characteristics and comparing against the planned groups for each synthesis (item #5)).                                                                                 | 7                  |
|                               | 13b    | Describe any methods required to prepare the data for presentation or synthesis, such as handling of missing summary statistics, or data conversions.                                                                                                                                                | -                  |
|                               | 13c    | Describe any methods used to tabulate or visually display results of individual studies and syntheses.                                                                                                                                                                                               | -                  |
|                               | 13d    | Describe any methods used to synthesize results and provide a rationale for the choice(s). If meta-analysis was performed, describe the model(s), method(s) to identify the presence and extent of statistical heterogeneity, and software package(s) used.                                          | -                  |
|                               | 13e    | Describe any methods used to explore possible causes of heterogeneity among study results (e.g. subgroup analysis, meta-regression).                                                                                                                                                                 | -                  |
|                               | 13f    | Describe any sensitivity analyses conducted to assess robustness of the synthesized results.                                                                                                                                                                                                         | -                  |
| Reporting bias assessment     | 14     | Describe any methods used to assess risk of bias due to missing results in a synthesis (arising from reporting biases).                                                                                                                                                                              | -                  |
| Certainty                     | 15     | Describe any methods used to assess certainty (or confidence) in the body of evidence for an outcome.                                                                                                                                                                                                | -                  |

| Section and Topic                              | Item # | Checklist item                                                                                                                                                                                                                                                                       | Reported on Page #           |
|------------------------------------------------|--------|--------------------------------------------------------------------------------------------------------------------------------------------------------------------------------------------------------------------------------------------------------------------------------------|------------------------------|
| assessment                                     |        |                                                                                                                                                                                                                                                                                      |                              |
| <b>RESULTS</b>                                 |        |                                                                                                                                                                                                                                                                                      |                              |
| Study selection                                | 16a    | Describe the results of the search and selection process, from the number of records identified in the search to the number of studies included in the review, ideally using a flow diagram.                                                                                         | 7, Fig 1                     |
|                                                | 16b    | Cite studies that might appear to meet the inclusion criteria, but which were excluded, and explain why they were excluded.                                                                                                                                                          | 7-8                          |
| Study characteristics                          | 17     | Cite each included study and present its characteristics.                                                                                                                                                                                                                            | 8, Table 1                   |
| Risk of bias in studies                        | 18     | Present assessments of risk of bias for each included study.                                                                                                                                                                                                                         | Supp. Table 1                |
| Results of individual studies                  | 19     | For all outcomes, present, for each study: (a) summary statistics for each group (where appropriate) and (b) an effect estimate and its precision (e.g. confidence/credible interval), ideally using structured tables or plots.                                                     | -                            |
| Results of syntheses                           | 20a    | For each synthesis, briefly summarise the characteristics and risk of bias among contributing studies.                                                                                                                                                                               | -                            |
|                                                | 20b    | Present results of all statistical syntheses conducted. If meta-analysis was done, present for each the summary estimate and its precision (e.g. confidence/credible interval) and measures of statistical heterogeneity. If comparing groups, describe the direction of the effect. | -                            |
|                                                | 20c    | Present results of all investigations of possible causes of heterogeneity among study results.                                                                                                                                                                                       | -                            |
|                                                | 20d    | Present results of all sensitivity analyses conducted to assess the robustness of the synthesized results.                                                                                                                                                                           | -                            |
| Reporting biases                               | 21     | Present assessments of risk of bias due to missing results (arising from reporting biases) for each synthesis assessed.                                                                                                                                                              | -                            |
| Certainty of evidence                          | 22     | Present assessments of certainty (or confidence) in the body of evidence for each outcome assessed.                                                                                                                                                                                  | -                            |
| <b>DISCUSSION</b>                              |        |                                                                                                                                                                                                                                                                                      |                              |
| Discussion                                     | 23a    | Provide a general interpretation of the results in the context of other evidence.                                                                                                                                                                                                    | 9-11                         |
|                                                | 23b    | Discuss any limitations of the evidence included in the review.                                                                                                                                                                                                                      | 12-13                        |
|                                                | 23c    | Discuss any limitations of the review processes used.                                                                                                                                                                                                                                | 12-13                        |
|                                                | 23d    | Discuss implications of the results for practice, policy, and future research.                                                                                                                                                                                                       | 12                           |
| <b>OTHER INFORMATION</b>                       |        |                                                                                                                                                                                                                                                                                      |                              |
| Registration and protocol                      | 24a    | Provide registration information for the review, including register name and registration number, or state that the review was not registered.                                                                                                                                       | 5                            |
|                                                | 24b    | Indicate where the review protocol can be accessed, or state that a protocol was not prepared.                                                                                                                                                                                       | Protocol provided on request |
|                                                | 24c    | Describe and explain any amendments to information provided at registration or in the protocol.                                                                                                                                                                                      | -                            |
| Support                                        | 25     | Describe sources of financial or non-financial support for the review, and the role of the funders or sponsors in the review.                                                                                                                                                        | 13                           |
| Competing interests                            | 26     | Declare any competing interests of review authors.                                                                                                                                                                                                                                   | 13                           |
| Availability of data, code and other materials | 27     | Report which of the following are publicly available and where they can be found: template data collection forms; data extracted from included studies; data used for all analyses; analytic code; any other materials used in the review.                                           | Available on request         |

*From:* Page MJ, McKenzie JE, Bossuyt PM, Boutron I, Hoffmann TC, Mulrow CD, et al. The PRISMA 2020 statement: an updated guideline for reporting systematic reviews. *BMJ* 2021;372:n71. doi: 10.1136/bmj.n71  
*For more information, visit:* <http://www.prisma-statement.org/>

Author accepted manuscript

## MOOSE Checklist for Meta-analyses of Observational Studies

| Item No                                     | Recommendation                                                                                                                                                                                                                                                               | Reported on Page No |
|---------------------------------------------|------------------------------------------------------------------------------------------------------------------------------------------------------------------------------------------------------------------------------------------------------------------------------|---------------------|
| Reporting of background should include      |                                                                                                                                                                                                                                                                              |                     |
| 1                                           | Problem definition                                                                                                                                                                                                                                                           | 5                   |
| 2                                           | Hypothesis statement                                                                                                                                                                                                                                                         | -                   |
| 3                                           | Description of study outcome(s)                                                                                                                                                                                                                                              | 6-7                 |
| 4                                           | Type of exposure or intervention used                                                                                                                                                                                                                                        | -                   |
| 5                                           | Type of study designs used                                                                                                                                                                                                                                                   | 6                   |
| 6                                           | Study population                                                                                                                                                                                                                                                             | 6                   |
| Reporting of search strategy should include |                                                                                                                                                                                                                                                                              |                     |
| 7                                           | Qualifications of searchers (eg, librarians and investigators)                                                                                                                                                                                                               | 5-6                 |
| 8                                           | Search strategy, including time period included in the synthesis and key words                                                                                                                                                                                               | 6                   |
| 9                                           | Effort to include all available studies, including contact with authors                                                                                                                                                                                                      | 6-7                 |
| 10                                          | Databases and registries searched                                                                                                                                                                                                                                            | 5                   |
| 11                                          | Search software used, name and version, including special features used (eg, explosion)                                                                                                                                                                                      | 5                   |
| 12                                          | Use of hand searching (eg, reference lists of obtained articles)                                                                                                                                                                                                             | 5                   |
| 13                                          | List of citations located and those excluded, including justification                                                                                                                                                                                                        | 7-8                 |
| 14                                          | Method of addressing articles published in languages other than English                                                                                                                                                                                                      | 6                   |
| 15                                          | Method of handling abstracts and unpublished studies                                                                                                                                                                                                                         | 6                   |
| 16                                          | Description of any contact with authors                                                                                                                                                                                                                                      | 7                   |
| Reporting of methods should include         |                                                                                                                                                                                                                                                                              |                     |
| 17                                          | Description of relevance or appropriateness of studies assembled for assessing the hypothesis to be tested                                                                                                                                                                   | 6                   |
| 18                                          | Rationale for the selection and coding of data (eg, sound clinical principles or convenience)                                                                                                                                                                                | 7                   |
| 19                                          | Documentation of how data were classified and coded (eg, multiple raters, blinding and interrater reliability)                                                                                                                                                               | 7                   |
| 20                                          | Assessment of confounding (eg, comparability of cases and controls in studies where appropriate)                                                                                                                                                                             | -                   |
| 21                                          | Assessment of study quality, including blinding of quality assessors, stratification or regression on possible predictors of study results                                                                                                                                   | 7                   |
| 22                                          | Assessment of heterogeneity                                                                                                                                                                                                                                                  | -                   |
| 23                                          | Description of statistical methods (eg, complete description of fixed or random effects models, justification of whether the chosen models account for predictors of study results, dose-response models, or cumulative meta-analysis) in sufficient detail to be replicated | -                   |
| 24                                          | Provision of appropriate tables and graphics                                                                                                                                                                                                                                 | Tables 1-3          |

| Reporting of results should include     |                                                                                                                           |               |
|-----------------------------------------|---------------------------------------------------------------------------------------------------------------------------|---------------|
| 25                                      | Graphic summarizing individual study estimates and overall estimate                                                       | -             |
| 26                                      | Table giving descriptive information for each study included                                                              | Table 1       |
| 27                                      | Results of sensitivity testing (eg, subgroup analysis)                                                                    | -             |
| 28                                      | Indication of statistical uncertainty of findings                                                                         | -             |
| Reporting of discussion should include  |                                                                                                                           |               |
| 29                                      | Quantitative assessment of bias (eg, publication bias)                                                                    | -             |
| 30                                      | Justification for exclusion (eg, exclusion of non-English language citations)                                             | 6             |
| 31                                      | Assessment of quality of included studies                                                                                 | Supp. Table 1 |
| Reporting of conclusions should include |                                                                                                                           |               |
| 32                                      | Consideration of alternative explanations for observed results                                                            | 10-13         |
| 33                                      | Generalization of the conclusions (ie, appropriate for the data presented and within the domain of the literature review) | 13            |
| 34                                      | Guidelines for future research                                                                                            | 12            |
| 35                                      | Disclosure of funding source                                                                                              | 13            |

*From:* Stroup DF, Berlin JA, Morton SC, et al, for the Meta-analysis Of Observational Studies in Epidemiology (MOOSE) Group. Meta-analysis of Observational Studies in Epidemiology. A Proposal for Reporting. *JAMA*. 2000;283(15):2008-2012. doi: 10.1001/jama.283.15.200
